# Supplementary material
Source: PubMed Central journal article supplement (PMC2084280)

**MW  
(kDa)**

**marker**

**TEM1-FC**

**188**

**98**

**52**

**33**

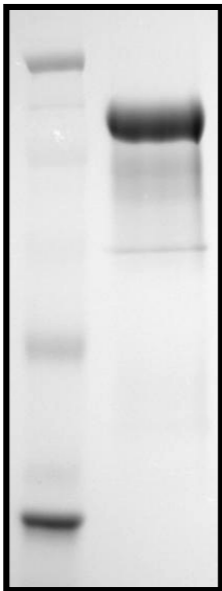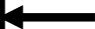

Supplement: pnas_0705647104_1.pdf [file pnas_0705647104_1.pdf]
